# Supplementary material for: An In-Vivo Model For Overloading-Induced Soft Tissue Injury
Source: Research Square preprint supplement (doi:10.21203/rs.3.rs-591719/v1), 2021-06-30
Supplement: Supplementary file 1 [file 18d106da3eb2f472460f7a85.xlsx]

## Sheet: Sheet1
Figure 1a	Foot A - 100%PT	Measurement area
		Unloaded		Loaded - Centre		Loaded - Edge
		Average	STDEV	Average	STDEV	Average	STDEV
	Overloading	1.2216	14.427	2.56359	8.97007	6.72441	9.12838
	Overloading+preconditioning	0.121308	14.3614	-0.75687	10.2551	2.95688	6.7058
Figure 2a	Foot B - 100%PT	Measurement area
		Unloaded		Loaded - Centre		Loaded - Edge
		Average	STDEV	Average	STDEV	Average	STDEV
	Overloading	1.1634	6.30175	3.75605	7.05	6.11495	8.93227
	Overloading+preconditioning	0.934232	5.26114	2.65479	6.91831	2.87558	6.59496
Figure 2b	Foot B - 80%PT	Measurement area
		Unloaded		Loaded - Centre		Loaded - Edge
		Average	STDEV	Average	STDEV	Average	STDEV
	Overloading	3.01805	7.72972	4.12402	9.40353	6.37851	6.2838
	Overloading+preconditioning	-1.3372	6.50367	-2.41	7.16725	-0.845242	7.70849
Figure 2c	Foot B - 50%PT	Measurement area
		Unloaded		Loaded - Centre		Loaded - Edge
		Average	STDEV	Average	STDEV	Average	STDEV
	Overloading	-1.32847	6.91986	-1.65799	7.68253	-0.882892	6.88403
	Overloading+preconditioning	-2.55116	8.21308	-2.69941	5.42097	-3.69153	7.42015
	B100	Distance from centre (cm)
	Average	-1.5		0		0.5
	condition
	Overloading
	Overloading+walking
	STDEV
	condition
	Overloading
	Overloading+walking
