# Supplementary material for: An In-Vivo Model For Overloading-Induced Soft Tissue Injury
Source: Research Square preprint supplement (doi:10.21203/rs.3.rs-591719/v1), 2021-06-30
Supplement: Supplementary file 3 [file 4ce591145ebc0b33a184e232.xlsx]

## Sheet: parameters
Participant	Participant number
Gender_1f_2m	Gender(1=Female, 2=male)
Age	Age (y)
Foot_1l_2r	Foot tested first - Foot A (1=Left, 2=right)
Weight	kg
Heigh	cm
BMI	kg/m2
VPT_L	Vibration Perception Threshold Left foot	All 3 measurements can be found in the individual taps for each participant
VPT_R	Vibration Perception Threshold Right foot	All 3 measurements can be found in the individual taps for each participant
VPT_A	Vibration Perception Threshold for the foot tested first
VPT_B	Vibration Perception Threshold for the foot tested second
PT_L	Pain Threshold Left foot	All 10 measurements can be found in the individual taps for each participant
PT_R	Pain Threshold Right foot	All 10 measurements can be found in the individual taps for each participant
PT_A	Pain Threshold for the foot tested first
PT_B	Pain Threshold for the foot tested second
A_Baseline_L	Foot A/ Shear wave speed (m/s)/ baseline/ circle 1.25cm left of image centre
A_Baseline_CL	Foot A/ Shear wave speed (m/s)/ baseline/ circle left edge of loaded area
A_Baseline_C	Foot A/ Shear wave speed (m/s)/ baseline/ circle centre of loaded area
A_Baseline_CR	Foot A/ Shear wave speed (m/s)/ baseline/ circle right edge of loaded area
A_Baseline_R	Foot A/ Shear wave speed (m/s)/ baseline/ circle 1.25cm right of image centre
A_1PT_L	Foot A/ Shear wave speed (m/s)/ loaded to 100% of Pain threshold/ circle 1.25cm left of image centre
A_1PT_CL	Foot A/ Shear wave speed (m/s)/ loaded to 100% of Pain threshold/ circle left edge of loaded area
A_1PT_C	Foot A/ Shear wave speed (m/s)/ loaded to 100% of Pain threshold/ circle centre of loaded area
A_1PT_CR	Foot A/ Shear wave speed (m/s)/ loaded to 100% of Pain threshold/ circle right edge of loaded area
A_1PT_R	Foot A/ Shear wave speed (m/s)/ loaded to 100% of Pain threshold/ circle 1.25cm right of image centre
A_1PT_preconditioning_L	Foot A/ Shear wave speed (m/s)/ loaded to 100% of Pain threshold+preconditioning/ circle 1.25cm left of image centre
A_1PT_preconditioning_CL	Foot A/ Shear wave speed (m/s)/ loaded to 100% of Pain threshold+preconditioning/ circle left edge of loaded area
A_1PT_preconditioning_C	Foot A/ Shear wave speed (m/s)/ loaded to 100% of Pain threshold+preconditioning/ circle centre of loaded area
A_1PT_preconditioning_CR	Foot A/ Shear wave speed (m/s)/ loaded to 100% of Pain threshold+preconditioning/ circle right edge of loaded area
A_1PT_preconditioning_R	Foot A/ Shear wave speed (m/s)/ loaded to 100% of Pain threshold+preconditioning/ circle 1.25cm right of image centre
B_Baseline_L	Foot B/ Shear wave speed (m/s)/ baseline/ circle 1.25cm left of image centre
B_Baseline_CL	Foot B/ Shear wave speed (m/s)/ baseline/ circle left edge of loaded area
B_Baseline_C	Foot B/ Shear wave speed (m/s)/ baseline/ circle centre of loaded area
B_Baseline_CR	Foot B/ Shear wave speed (m/s)/ baseline/ circle right edge of loaded area
B_Baseline_R	Foot B/ Shear wave speed (m/s)/ baseline/ circle 1.25cm right of image centre
B_05PT_L	Foot B/ Shear wave speed (m/s)/ loaded to 50% of Pain threshold/ circle 1.25cm left of image centre
B_05PT_CL	Foot B/ Shear wave speed (m/s)/ loaded to 50% of Pain threshold/ circle left edge of loaded area
B_05PT_C	Foot B/ Shear wave speed (m/s)/ loaded to 50% of Pain threshold/ circle centre of loaded area
B_05PT_CR	Foot B/ Shear wave speed (m/s)/ loaded to 50% of Pain threshold/ circle right edge of loaded area
B_05PT_R	Foot B/ Shear wave speed (m/s)/ loaded to 50% of Pain threshold/ circle 1.25cm right of image centre
B_05PTpreconditioning_L	Foot B/ Shear wave speed (m/s)/ loaded to 50% of Pain threshold+preconditioning/ circle 1.25cm left of image centre
B_05PTpreconditioning_CL	Foot B/ Shear wave speed (m/s)/ loaded to 50% of Pain threshold+preconditioning/ circle left edge of loaded area
B_05PTpreconditioning_C	Foot B/ Shear wave speed (m/s)/ loaded to 50% of Pain threshold+preconditioning/ circle centre of loaded area
B_05PTpreconditioning_CR	Foot B/ Shear wave speed (m/s)/ loaded to 50% of Pain threshold+preconditioning/ circle right edge of loaded area
B_05PTpreconditioning_R	Foot B/ Shear wave speed (m/s)/ loaded to 50% of Pain threshold+preconditioning/ circle 1.25cm right of image centre
B_08PT_L	Foot B/ Shear wave speed (m/s)/ loaded to 80% of Pain threshold/ circle 1.25cm left of image centre
B_08PT_CL	Foot B/ Shear wave speed (m/s)/ loaded to 80% of Pain threshold/ circle left edge of loaded area
B_08PT_C	Foot B/ Shear wave speed (m/s)/ loaded to 80% of Pain threshold/ circle centre of loaded area
B_08PT_CR	Foot B/ Shear wave speed (m/s)/ loaded to 80% of Pain threshold/ circle right edge of loaded area
B_08PT_R	Foot B/ Shear wave speed (m/s)/ loaded to 80% of Pain threshold/ circle 1.25cm right of image centre
B_08PTpreconditioning_L	Foot B/ Shear wave speed (m/s)/ loaded to 80% of Pain threshold+preconditioning/ circle 1.25cm left of image centre
B_08PTpreconditioning_CL	Foot B/ Shear wave speed (m/s)/ loaded to 80% of Pain threshold+preconditioning/ circle left edge of loaded area
B_08PTpreconditioning_C	Foot B/ Shear wave speed (m/s)/ loaded to 80% of Pain threshold+preconditioning/ circle centre of loaded area
B_08PTpreconditioning_CR	Foot B/ Shear wave speed (m/s)/ loaded to 80% of Pain threshold+preconditioning/ circle right edge of loaded area
B_08PTpreconditioning_R	Foot B/ Shear wave speed (m/s)/ loaded to 80% of Pain threshold+preconditioning/ circle 1.25cm right of image centre
B_1PT_L	Foot B/ Shear wave speed (m/s)/ loaded to 100% of Pain threshold/ circle 1.25cm left of image centre
B_1PT_CL	Foot B/ Shear wave speed (m/s)/ loaded to 100% of Pain threshold/ circle left edge of loaded area
B_1PT_C	Foot B/ Shear wave speed (m/s)/ loaded to 100% of Pain threshold/ circle centre of loaded area
B_1PT_CR	Foot B/ Shear wave speed (m/s)/ loaded to 100% of Pain threshold/ circle right edge of loaded area
B_1PT_R	Foot B/ Shear wave speed (m/s)/ loaded to 100% of Pain threshold/ circle 1.25cm right of image centre
B_1PTpreconditioning_L	Foot B/ Shear wave speed (m/s)/ loaded to 100% of Pain threshold+preconditioning/ circle 1.25cm left of image centre
B_1PTpreconditioning_CL	Foot B/ Shear wave speed (m/s)/ loaded to 100% of Pain threshold+preconditioning/ circle left edge of loaded area
B_1PTpreconditioning_C	Foot B/ Shear wave speed (m/s)/ loaded to 100% of Pain threshold+preconditioning/ circle centre of loaded area
B_1PTpreconditioning_CR	Foot B/ Shear wave speed (m/s)/ loaded to 100% of Pain threshold+preconditioning/ circle right edge of loaded area
B_1PTpreconditioning_R	Foot B/ Shear wave speed (m/s)/ loaded to 100% of Pain threshold+preconditioning/ circle 1.25cm right of image centre

## Sheet: Data
Participant	Gender_1f_2m	Age	Foot_1l_2r	Weight	Heigh	BMI	VPT_L	VPT_R	VPT_A	VPT_B	PT_L	PT_R	PT_A	PT_B	A_Baseline_L	A_Baseline_CL	A_Baseline_C	A_Baseline_CR	A_Baseline_R	A_1PT_L	A_1PT_CL	A_1PT_C	A_1PT_CR	A_1PT_R	A_1PT_preconditioning_L	A_1PT_preconditioning_CL	A_1PT_preconditioning_C	A_1PT_preconditioning_CR	A_1PT_preconditioning_R	B_Baseline_L	B_Baseline_CL	B_Baseline_C	B_Baseline_CR	B_Baseline_R	B_05PT_L	B_05PT_CL	B_05PT_C	B_05PT_CR	B_05PT_R	B_05PTpreconditioning_L	B_05PTpreconditioning_CL	B_05PTpreconditioning_C	B_05PTpreconditioning_CR	B_05PTpreconditioning_R	B_08PT_L	B_08PT_CL	B_08PT_C	B_08PT_CR	B_08PT_R
1	1	37	2	76.3	163	28.7177	2.33333	2	2	2.33333	17.2	17.2	17.2	17.2	3.2	4.1	4.2	4.4	2.9	4.7	4.9	4.8	4.7	3.1	4	5.7	5.6	4.7	3.8	3.4	4.3	4.3	4.5	4.1	2.9	4	4	4.3	3.9	3.1	4.2	4.2	4.2	4	3.4	4.4	4.3	4.5	4.4
2	1	34	1	78.6	168	27.8486	2.16667	2.33333	2.33333	2.16667	28.3	37.2	28.3	37.2	9.7	7.8	6.8	7.7	8.7	9.3	7.2	6.8	7.2	8.3	5.7	8.1	7.4	7.4	7.9	10.3	7.7	6.6	7.7	7.5	9.3	8.1	6.7	7.6	8.9	7.1	7.4	7.4	7.8	8.3	9.7	7.9	6.5	8.1	9.6
3	2	51	2	118	176	38.094	6.16667	5.66667	5.66667	6.16667	99	110.7	110.7	99	5.9	6	5.7	5.9	6	6.4	7	6.4	6.7	6.2	6	6.6	6.1	6.4	5.9	5.8	5.8	6.1	5.8	6.4	6.1	6.6	6.4	6.2	6.3	5.5	5.7	5.6	5.8	6.2	5.3	6.3	6.1	6.2	6.4
4	2	44	1	68.25	179	21.3008	3.16667	4	4	3.16667	105.9	92.5	105.9	92.5	6.1	5.9	5.9	5.8	5.5	4.5	5.7	6	6	5.2	6	6.3	5.7	6	4.3	5.1	6.9	6.3	6.3	4.8	5.1	5.7	5.9	5.7	5.1	4.6	5.7	5.9	5.7	5.1	5.5	7.4	6.8	6.1	5.4
5	2	45	2	63.95	166.5	23.0681	4.66667	4	4	4.66667	22.5	17.7	17.7	22.5	7	7.4	8	8.8	8.2	9.3	9.2	7.2	8.6	6	9.8	8.1	6.4	8.6		9	8.2	7.8	7.4	7.5	0	7.4	7.1	8.7			9	7.6	8.8	10.1
6	2	52	1	69.65	167.2	24.9143	4.5	3.83333	3.83333	4.5	62.6	69.9	62.6	69.9	7.9	7.5	7.5	7.7	6	8.2	8	7.3	7.7	5	7.8	7.6	6.8	9	9.1	7.8	7.1	6.8	7.7	8.5	10.5	7.5	6.8	9	7.9	7.8	6.9	6.9	7	6.9	5.2	6.5	7.1	6.9	8.7
7	2	34	2	72.75	175.5	23.6199	2.16667	2.16667	2.16667	2.16667	43.3	39.9	39.9	43.3	5.7	6	6	5.9	4.7	6.1	6.3	6.3	6.1	4.9	5.7	6.2	6.2	6.2	4.9	5.4	6	5.7	5.5	4.4	5.1	5.6	6	5.4	5.1	4.3	5	5.2	5.3	5	4.6	5.9	5.7	5.6	5.2
8	1	40	1	59	162	22.4813	3.83333	4.5	4.5	3.83333	42.5	36.7	42.5	36.7	4.7	4.3	4.2	4.4	4.6	4.6	4.8	4.5	5	5.3	4.4	4.5	4.4	4.3	4.6	3.8	4.5	4.6	4.2		4.4	4.5	4.4	4.2	3.3	3.8	4.1	3.9	4	3.9	3.9	4.4	4.5	4.5	4.1
9	2	33	2	75.25	165.5	27.4733	4	4.66667	4.66667	4	22.1	20.8	20.8	22.1	6.8	6.9	6.7	6.9	7.5	5.7	7	7.1	7.5	6.7	4.8	6.6	6.8	6.5	6.5	6.2	6.8	7.1	7.2	7.1	6.1	6.3	6.2	6.3	6.7	6.5	6.8	7.2	6.7		5.8	7.1	6.7	7	7.1
10	2	47	1	94.95	164.5	35.0884	3.83333	4.16667	4.16667	3.83333	25.4	31.3	25.4	31.3	6.3	5.9	5.8	5.9	5.8	6.3	6.2	6.2	6.5	5.4	6.4	6.3	6.1	5.8	6	6.7	6.3	6.7	6.8	6.9	6.4	6.6	6.7	6.9	6.7	6.8	6.7	6.9	7.1	6	6.8	6.9	6.7	6.8	5.6
11	2	42	2	82.6	187	23.6209	3.33333	3	3	3.33333	35.9	29.9	29.9	35.9	4.2	4.4	4.6	4.2	3.8	3.8	4.4	4	4	3.8	3.8	4	3.7	3.6	3.6	4.1	4.6	4.2	4.5	4.4	3.8	4.5	4.6	4.5	3.8	3.8	3.8	4.3	4.3	3.8	3.4	4.2	4.8	4.7	4.3
12	2	55	1	125.6	180	38.7654	4.5	9.16667	9.16667	4.5	52.3	72.1	52.3	72.1	5.6	6.5	6.5	7.9		7.3	7.8	7.1	8.7	8.8	5	7.1	6.7	8	4	7.3	7.4	6.5	6.7	5.8	6.4	7.4	6.3	6.3	6	6.5	6.7	5.9	5.8	5.8	6.9	7.7	7.1	7.1	6.3
13	1	46	2	60.95	170	21.09	1.66667	2.16667	2.16667	1.66667	25.2	20.9	20.9	25.2	4.7	5.2	5.2	5	5.2	5.6	6.1	5.6	5.3	3.4	5.2	5.3	4.9	5.2	5.3	5.5	5.9	5.5	5.6	5.6	5.3	5.3	5.5	5.4	5.9	5.6	5.6	5.3	5.4	4.9	5.4	5.5	5.5	5.5	6.3
14	2	23	1	82.78	187	23.6724	2.66667	2.5	2.5	2.66667	22.5	21.9	22.5	21.9	5.3	5.8	5.7	6	6.2	5.4	6.3	6	5.8	6	5.2	6.2	5.8	6.5	6.5	5.4	5.8	5.7	6.1	6.2	5.9	5.9	6.1	6.2	5.8	5.9	5.9	5.8	5.9		6.2	6.2	6.2	6.2	5.6
15	2	45	2	81.6	171	27.906	3.33333	5.33333	5.33333	3.33333	32.3333	34.6	34.6	32.3333	5	5.3	4.6	4.6	5.1	5.5	6.2	6	6.9	5.6	5.3	5.2	4.6	4.7	4.9	5.5	4.6	4.8	4.7	5.4	5.3	4.6	4.5	5.1	4.5	5	4.9	4.8	5.2	5.3	4.9	5.7	6.1	5.5	5.2
16	2	20	1	73.6	181.5	22.3421	2.33333	2.66667	2.66667	2.33333	36.5	35.6	36.5	35.6	7.3	7.1	6.7	7.7	8.7	6.3	6.4	6.4	7.7		8.3	7.5	7	7.5	8.1	8.6	7.9	7	6.6	5.5	7.8	7.3	7.1	7	5.6	8.2	7.5	7	5.4	5.3	7.9	7.9	7	6.7	5.5
17	2	36	2	90	184	26.5832	4.16667	3.33333	3.33333	4.16667	43.7	44.1	44.1	43.7	6.1	5.6	5.5	5.1	4.7	5.5	6.4	5.5	5.2		5.7	5.8	5.3	5.3		5.6	6.2	6.2	5.7			6.4	5.9	5.9			5.9	6.1	6.3	6.4		6.7	6	5.8
18	1	21	1	84.5	171	28.8978	3.33333	2.83333	2.83333	3.33333	23.75	24.8	23.75	24.8	7.2	6.5	6.3	6.2	6.6											5.3	6.2	6.3	6.6	6.2	5.1	5.8	6.1	6.3	6	5.6	5.8	5.8	5.8		5.1	5.6	6	6.2	5.1
19	1	29	2	49.15	158.5	19.5643	2.16667	2.66667	2.66667	2.16667	23.5	18.1	18.1	23.5	5.2	5.5	5.5	5.4	5.2	5	5.2	5.1	5.5	5.1	5.2	5.5	5.1	5	4.8	5.3	6.1	5.9	6.4	6.3	4.7	5.3	5.2	5.4	5.5	5	5.3	5.8	5.5	5.2	4.8	5.4	5	5.7	5.5
20	2	24	1	59.55	179.5	18.4822	3	1.66667	1.66667	3	28	28.2	28	28.2	6.2	6	5.9	5.6	5.5	5.9	5.7	5.6	5.6	5.8	5.6	5.7	5.6	5.7	5.4	5.9	6.6	6.1	6.4	7.1	6.6	7	6.7	6.7	8	5.9	6.6	6.1	6.5	7.1	5.5	6.3	5.9	6.4	7.4
21	2	23	2	54.75	173.5	18.188	4.5	3.5	3.5	4.5	28.2	27	27	28.2	4.1	3.8	4	4.1	3.9	4.2	4.6	4.1	4.3	4.1	4.2	4	3.9	4.2	3.9	4	4	3.9	4	4.3	4.1	3.9	3.8	4.3	4.1	4.2	3.9	3.8	4.1	4.2	4.2	4.1	3.9	4.4	4.3
22	2	35	1	96.75	183	28.8901	1.83333	3.16667	3.16667	1.83333	19.3	26	19.3	26	9.7	8.6	7.9	8.4		9.8	8.9	7.4	8.2		9.5	8.7	7.3	8.8	10.3	9	8.5	8	9.1	9.1	8	7.3	6.7	8.3	7.8	8.7	8.2	7.3	8.7	8.1	8.6	7.6	7.3	7.9	7.7
23	1	26	2	124.2	171	42.4746	2.83333	3.33333	3.33333	2.83333	20.7	18.7	18.7	20.7	7.7	7.8	7.4	7.7		8	7.9	7.8	7.9	7.3	7.6	8.1	7.9	8	8.6	8.5	7.8	7.7	7.6	7.6	7.3	7	7	6.7	6.7	7.6	7.9	7.1	7.5	7.8	6.9	7.3	7	7	7.7
24	1	33	1	84.35	170	29.1869	2.33333	1.33333	1.33333	2.33333	31	36	31	36	5.4	5.2	5.2	5	4.8	5.3	5.2	5.2	4.9	4.2	4.6	5	4.8	4.8	4.5	4.9	5	5.3	5.2	5.7	4.9	5.5	6	6	6	5.3	5.3	5.3	5.3	5.7	4.8	5.4	5.6	5.6	5.7
25	1	35	2	88.7	173	29.6368	3.16667	3.16667	3.16667	3.16667	58.6	49.7	49.7	58.6	6.1	5.9	6	5.7	6	6.2	5.9	6.2	6.1	5.9	6.5	6.2	5.7	5.6	5.5	5.5	5.9	5.9	5.6	6.4	5.3	5.7	5.4	5.2	6.2	5.2	5.7	5.7	5.6	6	5.4	6.4	5.7	5.5	5.3
26	1	23	1	49.55	169	17.3488	3.5	3	3	3.5	55.9	64.9	55.9	64.9	4.1	4.6	4.8	4.8	4.2	4.3	4.9	4.6	4.6	4.2	4.3	4.8	4.7	4.9	3.8	4.9	4.7	4.4	4.4	4.2	4.4	4.7	4.8	5	4.4	4.2	4.5	4.3	4	3.9	4.5	4.8	4.7	4.6	4.1
[truncated: 15 more columns]

## Sheet: 1
Name:		Age	37
Body weight (kgr):	76.3
Height (cm):	163
Date of testing
Foot tested first (1=L/2=R)	2
	Pain threshold (N)
	Right	Left
1	18	18
2	14	14
3	17	17
4	15	15
5	16	16
6	19	19
7	17	17
8	20	20
9	17	17
10	19	19
Average	17.2	17.2
STDEV	1.8738	1.8738
%	10.8942	10.8942
VPT(Volt)	1	2	3	Average
Left	2.5	2.5	2	2.33333
Right	2	2	2	2
			Total VPT	2.16667

## Sheet: 2
Name:		Age	34
Body weight (kgr):	78.6
Height (cm):	168
Date of testing
Foot tested first (1=L/2=R)	1
	Pain threshold (N)
	Right	Left
1	35	22
2	37	29
3	37	24
4	39	27
5	36	27
6	34	26
7	39	30
8	37	31
9	39	38
10	39	29
Average	37.2	28.3
STDEV	1.81353	4.3729
%	4.87508	15.4519
VPT(Volt)	1	2	3	Average
Left	2.5	2	2	2.16667
Right	2	2.5	2.5	2.33333
			Total VPT	2.25

## Sheet: 3
Name:		Age	51
Body weight:	118
Height:	176
Date of testing
Foot tested first (1=L/2=R)	2
	Pain threshold (N)
	Right	Left
1	119	110
2	99	100
3	105	100
4	116	101
5	112	101
6	114	98
7	117	97
8	119	91
9	114	95
10	92	97
Average	110.7	99
STDEV	9.11714	4.94413
%	8.2359	4.99407
VPT(Volt)	1	2	3	Average
Left	5.5	6	7	6.16667
Right	6	5	6	5.66667
			Total VPT	5.91667

## Sheet: 4
Name:		Age	44
Body weight(kgr):	68.25
Height(cm):	179
Date of testing
Foot tested first (1=L/2=R)	1
	Pain threshold (N)
	Right	Left
1	80	110
2	89	99
3	92	110
4	91	112
5	86	107
6	96	121
7	95	115
8	95	103
9	102	88
10	99	94
Average	92.5	105.9
STDEV	6.41613	10.005
%	6.93635	9.44759
VPT(Volt)	1	2	3	Average
Left	3	3.5	3	3.16667
Right	4.5	4.5	3	4
			Total VPT	3.58333

## Sheet: 5
Name:		Age	45
Body weight (kgr):	63.95
Height (cm):	166.5
Date of testing
Foot tested first (1=L/2=R)	2
	Pain threshold (N)
	Right	Left
1	17	24
2	13	23
3	11	22
4	17	20
5	20	21
6	21	21
7	21	21
8	18	24
9	19	24
10	20	25
Average	17.7	22.5
STDEV	3.36815	1.71594
%	19.0291	7.62639
VPT(Volt)	1	2	3	Average
Left	4.5	5	4.5	4.66667
Right	4	4	4	4
			Total VPT	4.33333

## Sheet: 6
Name:		Age	52
Body weight (kgr):	69.65
Height (cm):	167.2
Date of testing
Foot tested first (1=L/2=R)	1
	Pain threshold (N)
	Right	Left
1	69	41
2	65	64
3	71	60
4	74	67
5	72	65
6	65	64
7	70	67
8	71	72
9	72	61
10	70	65
Average	69.9	62.6
STDEV	2.92309	8.28922
%	4.18181	13.2416
VPT(Volt)	1	2	3	Average
Left	5	4	4.5	4.5
Right	3.5	4	4	3.83333
			Total VPT	4.16667

## Sheet: 7
Name:		Age	34
Body weight (kgr):	72.75
Height (cm):	175.5
Date of testing
Foot tested first (1=L/2=R)	2
	Pain threshold (N)
	Right	Left
1	41	40
2	41	39
3	49	38
4	37	40
5	34	42
6	40	42
7	40	45
8	36	51
9	41	46
10	40	50
Average	39.9	43.3
STDEV	4.01248	4.54728
%	10.0563	10.5018
VPT(Volt)	1	2	3	Average
Left	2	2	2.5	2.16667
Right	2	2.5	2	2.16667
			Total VPT	2.16667

## Sheet: 8
Name:		Age	40
Body weight (kgr):	59
Height (cm):	162
Date of testing
Foot tested first (1=L/2=R)	1
	Pain threshold (N)
	Right	Left
1	37	44
2	34	35
3	35	37
4	33	42
5	37	40
6	37	42
7	39	44
8	39	48
9	37	44
10	39	49
Average	36.7	42.5
STDEV	2.11082	4.37798
%	5.75155	10.3011
VPT(Volt)	1	2	3	Average
Left	5	3	3.5	3.83333
Right	4.5	4.5	4.5	4.5
			Total VPT	4.16667

[truncated: 18 more sheets: 9, 10, 11, 12, 13, 14, 15, 16, 17, 18, 19, 20, 21, 22, 23, 24, 25, 26]
